# Supplementary material for: Binary Ni2FeOx anchored on modified graphite for efficient and durable oxygen evolution electrocatalysis
Source: Royal Society of Chemistry journal article supplement (doi:10.1039/c8se00307f), 2018-01-01
Supplement: c8se00307f1.pdf [file c8se00307f1.pdf]

**Binary Ni<sub>2</sub>FeO<sub>x</sub> anchored on modified graphite towards efficient and durable  
oxygen evolution electrocatalysis**

Lu Bai, Jingqi Guan\*

**Experimental**

**Materials and reagents**

All chemicals were analytical grade and used as purchased without further purification. Solutions were prepared using high purity water (Millipore Milli-Q purification system, resistivity > 18 MΩ•cm).

**Synthesis of G-Ph**

Typically, the dark gray graphite powder (0.5 g, 41.6 mmol of carbon) was dispersed in benzene (400 mL) in a 500 mL three necked round-bottom flask equipped with a magnetic stir bar. The contents were then stirred vigorously after benzoyl peroxide (10.1 g, 41.6 mmol) was added. The mixture was then heated at 80 °C for 12 h with continuous vigorous stirring. After cooling down, the contents of the flask were centrifuged and washed with ethanol for four times. The black solid was dried at 60 °C overnight, which was nominated as G-Ph.

**Synthesis of G-Ph-SO<sub>3</sub>H**

The typical experimental processes include as follows: the phenylated graphite (G-Ph) (200 mg) was dispersed in oleum (70 mL, H<sub>2</sub>SO<sub>4</sub>, 25% as free SO<sub>3</sub>), and heated at 80 °C for 5 h to yield phenyl sulfonated graphite. After cooling down, 300 g of ice block was then carefully added into the suspension. The mixture was then centrifuged and washed with water several times until the pH value of the filtrate reached ~7. The obtained solid was dried at 60 °C overnight, which was nominated as G-Ph-SO<sub>3</sub>H.

### **Synthesis of Ni<sub>n</sub>FeO<sub>x</sub>@G-Ph-SN**

Typically, stoichiometric Ni(NO<sub>3</sub>)<sub>2</sub>•6H<sub>2</sub>O, 0.03 g Fe(NO<sub>3</sub>)<sub>3</sub>•9H<sub>2</sub>O, 0.1 g G-Ph-SO<sub>3</sub>H, and 50 μL of deionized water were added in 20.0 mL of ethanol solution. Under stirring, 75 μL of 28% ammonia was added to the mixture. Afterwards, it was transferred into 30 mL Teflon autoclave and heated at 150 °C for 2 h. After cooling down, the solid was obtained by filtering, washing with water for several times, and drying at 70 °C overnight, which was denoted as Ni<sub>n</sub>FeO<sub>x</sub>@G-Ph-SN (where n presents the atomic ratio of Ni/Fe). The loading content of Fe is ca. 4.0 wt.% measured by ICP-AES. The Ni content in NiFeO<sub>x</sub>@G-Ph-SN, Ni<sub>2</sub>FeO<sub>x</sub>@G-Ph-SN, and Ni<sub>3</sub>FeO<sub>x</sub>@G-Ph-SN, is 3.9 wt.%, 7.7 wt.%, and 11.5 wt.% determined by ICP-AES.

### **Characterizations of samples**

The as-prepared samples were characterized by X-ray powder diffraction (XRD) on a Rigaku D/Max-2500/PC powder diffractometer. The sample powder was scanned using Cu-K $\alpha$  radiation with an operating voltage of 40 kV and current of 200 mA. The scan rate of 5°/min was applied to record the patterns in the range of 10-80°. Transmission electron microscope (TEM) images were observed by a Hitachi HT7700. High resolution TEM (HRTEM) images were recorded on a JEM-2100 transmission electron microscope (Tokyo, Japan) at 200 kV. The loading amount of manganese oxide in the catalyst was determined using inductively coupled plasma atomic emission spectrometer (ICP-AES) on a Shimadzu ICPS-8100. Prior to ICP-AES measurement, supported manganese oxide was dissolved in aqua regia. The valence state of cobalt oxide cluster was determined using XPS recorded on a Thermo ESCALAB 250Xi. The X-ray source selected was monochromatized Al K $\alpha$  source (15 kV, 10.8 mA). Region scans were collected using a 20 eV pass energy. Peak positions were calibrated relative to C 1s peak position at 284.6 eV.

### **Electrochemical characterization**

The electrochemical water oxidation performances of all the manganese-based electrodes were tested in a conventional three-electrode electrochemical cell with a platinum plate as the auxiliary electrode and a saturated calomel electrode (SCE, saturated KCl) as the reference electrode. 1 M KOH aqueous solution was used as

electrolyte with pH measured at ca. 13.6. The scanning rate was 5 mV/s. All potentials measured were calibrated to RHE using the following equation:  $E(\text{RHE}) = E(\text{SCE}) + 0.241\text{V} + 0.0591\text{pH}$ . The steady-state activity and long-term activity were evaluated by chronopotentiometry measurements. The ECSA was determined by measuring the capacitive current associated with doublelayer charging from the scan rate CV-dependence. Here, the CV potential window was 0.15 to 0.25 vs SCE. The scan rates were 20, 40, 60, 80, and 100 mV s<sup>-1</sup>. The double-layer capacitance ( $C_{\text{dl}}$ ) was estimated  $\Delta j = (j_{\text{charge}} - j_{\text{off charge}})$  at 0.2 V vs SCE against the scan rate. The linear slope is twice of the double-layer capacitance  $C_{\text{dl}}$ . Electrochemical impedance spectroscopy (EIS) measurements were performed at open-circuit potential in the frequency range from 100 kHz to 0.1 Hz with an a.c. perturbation of 10 mV.

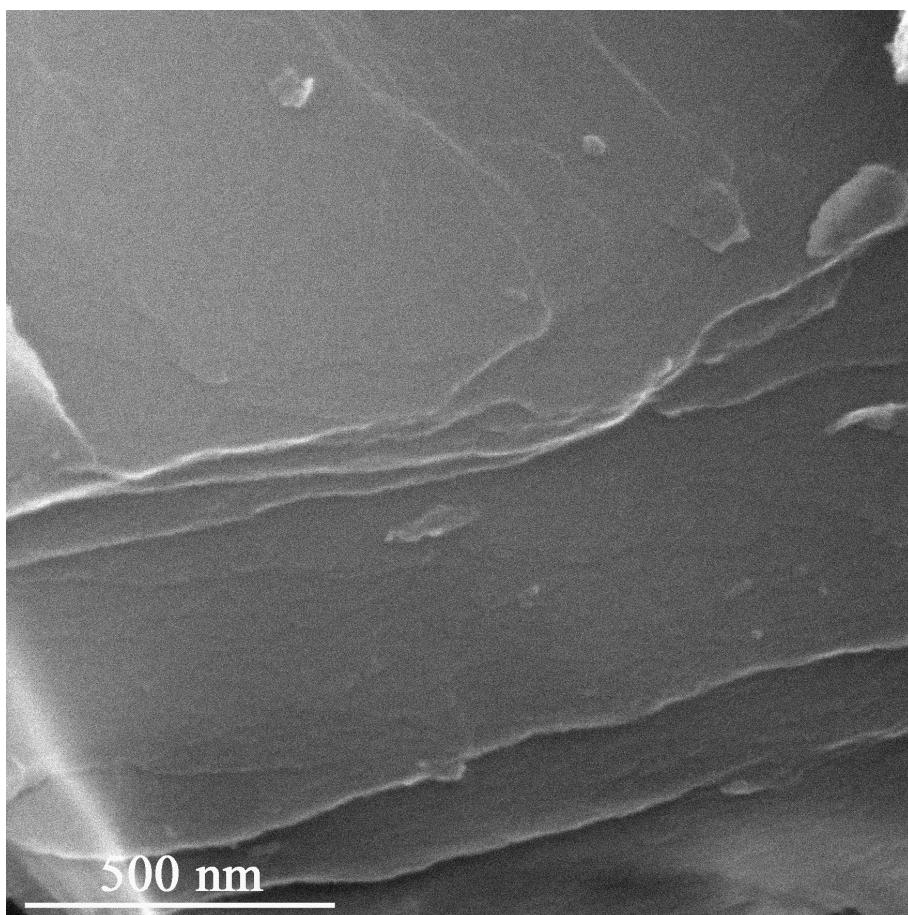

**Figure S1.** SEM image of G-Ph-SO<sub>3</sub>H.

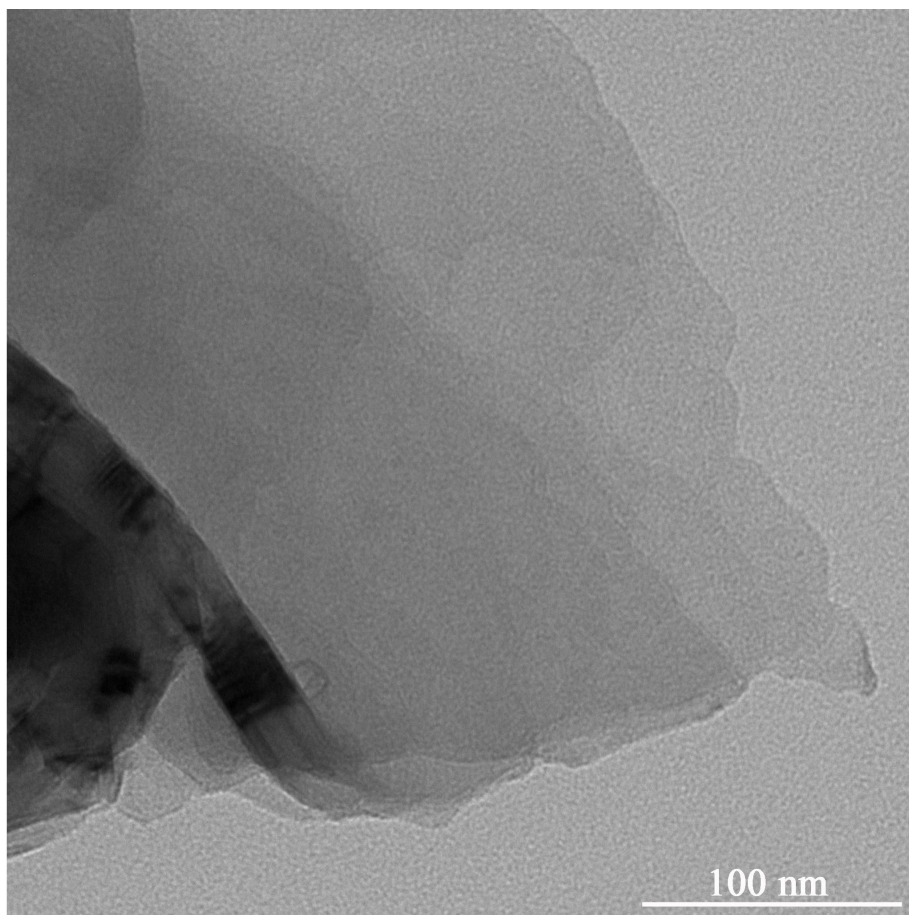

**Figure S2.** TEM image of G-Ph-SO<sub>3</sub>H.

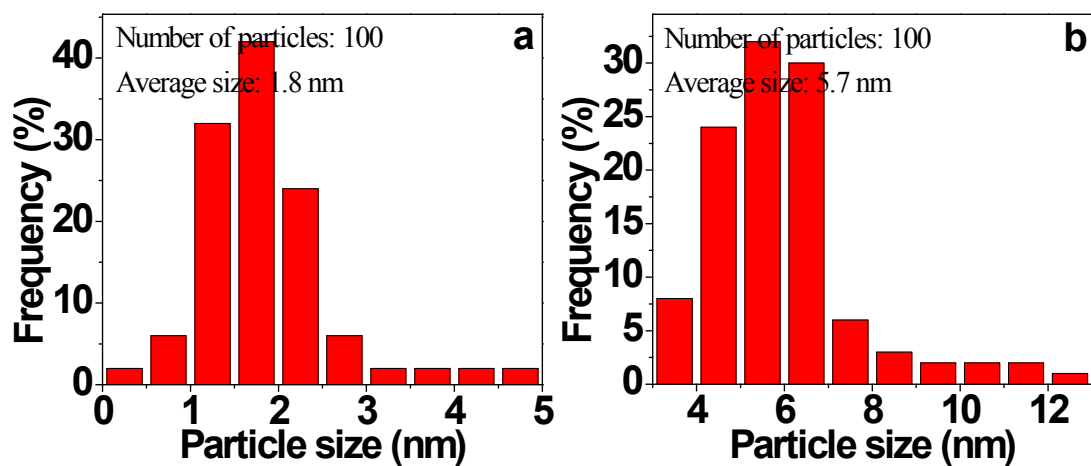

**Figure S3.** The histogram of size distribution of typical samples: FeO<sub>x</sub>@G-Ph-SN (a), and NiO<sub>x</sub>@G-Ph-SN.

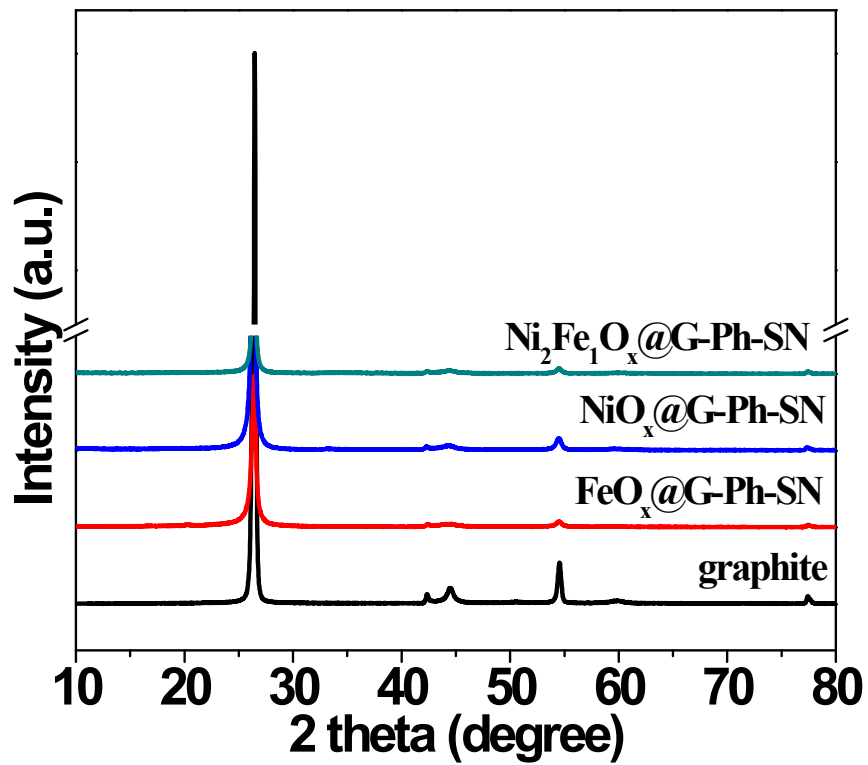

**Figure S4.** XRD patterns of graphite, FeO<sub>x</sub>@G-Ph-SN, NiO<sub>x</sub>@G-Ph-SN, and Ni<sub>2</sub>FeO<sub>x</sub>@G-Ph-SN.



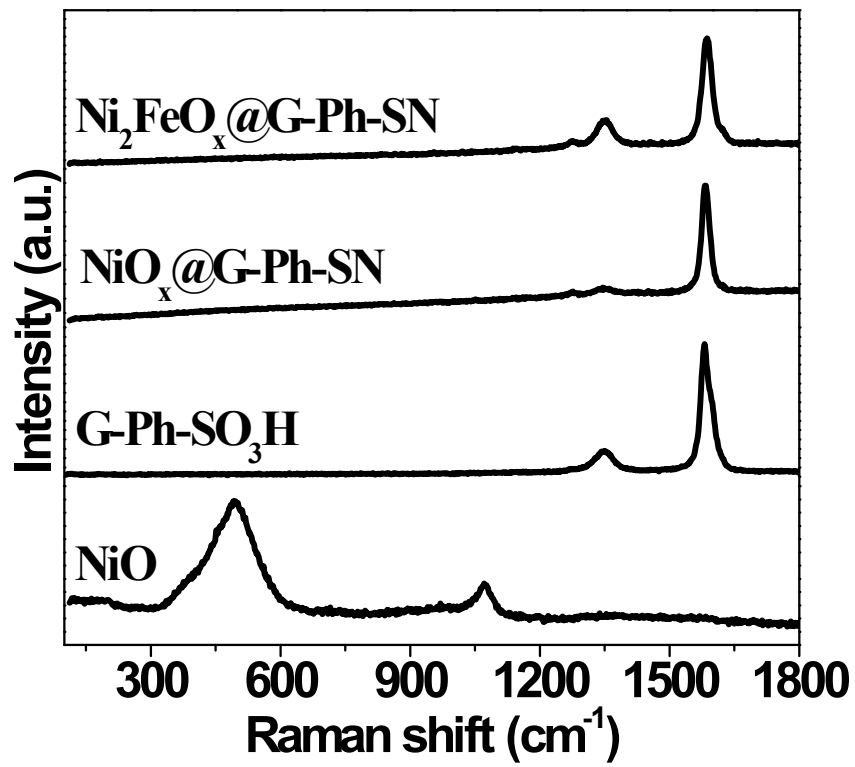

**Figure S5.** Raman spectra of NiO, G-Ph-SO<sub>3</sub>H, NiO<sub>x</sub>@G-Ph-SN, and Ni<sub>2</sub>FeO<sub>x</sub>@G-Ph-SN

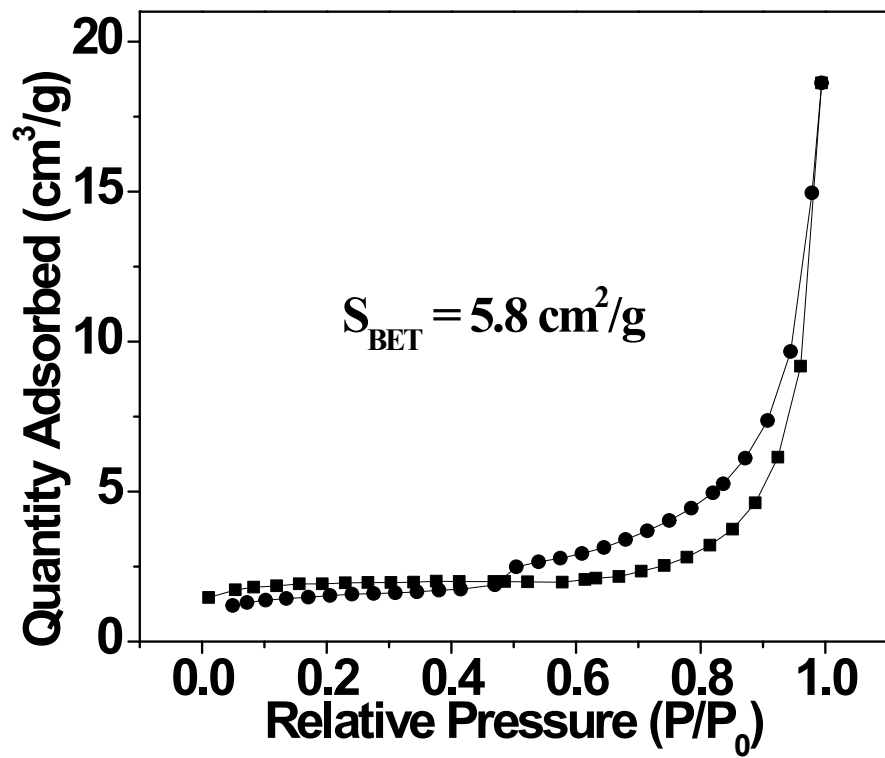

**Figure S6.** N<sub>2</sub> adsorption and desorption isotherms of the Ni<sub>2</sub>FeO<sub>x</sub>@G-Ph-SN sample.

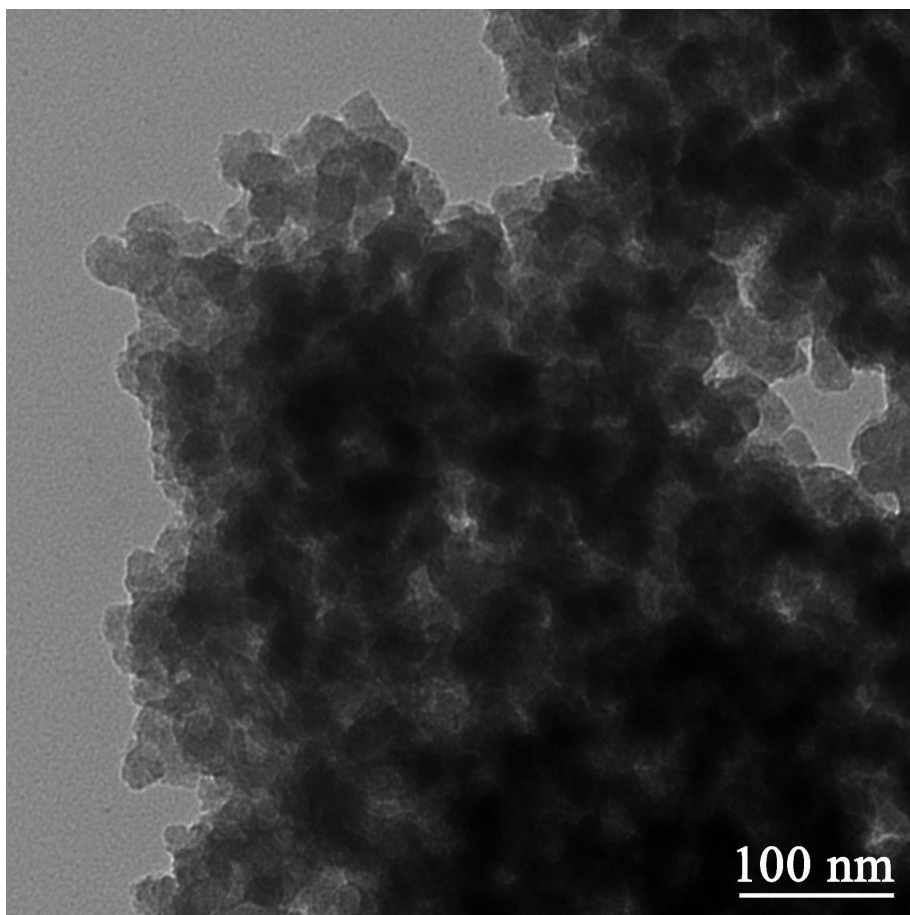

**Figure S7.** TEM image of IrO<sub>2</sub> nanoparticles.

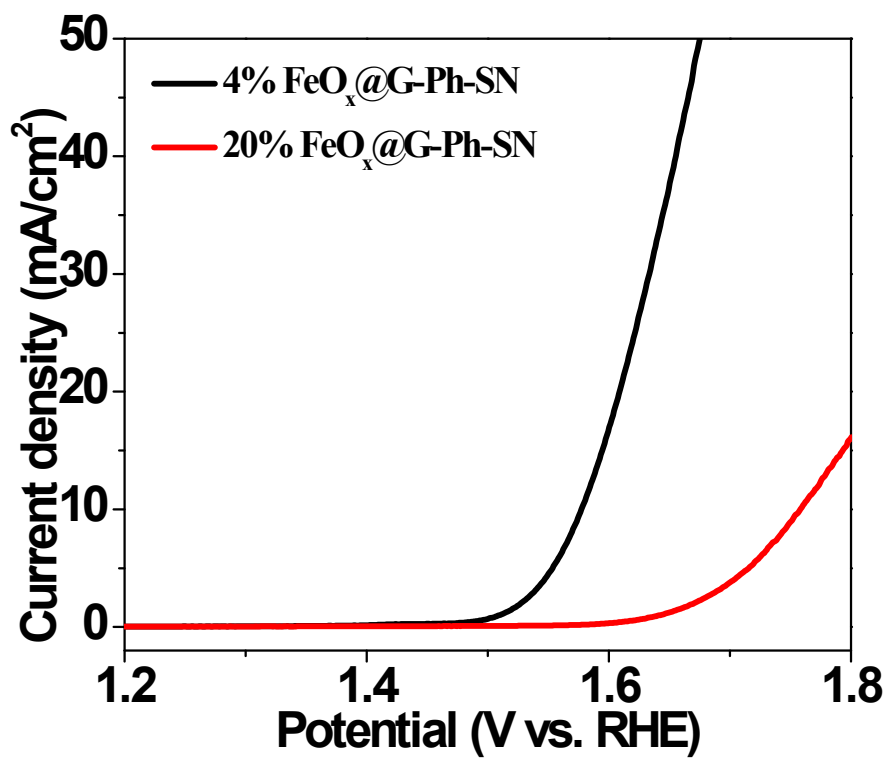

Figure S8. Polarization curves of FeO<sub>x</sub>@G-Ph-SN with different Fe loadings.

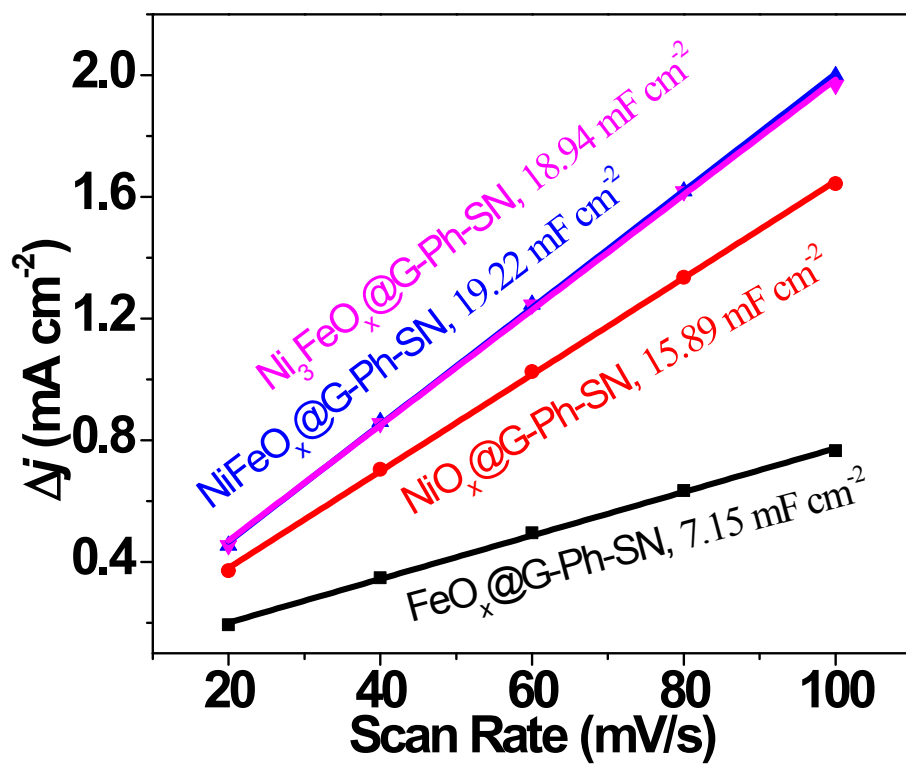

**Figure S9.** Capacitive  $j$  vs scan rate for  $\text{FeO}_x@G\text{-Ph-SN}$ ,  $\text{NiO}_x@G\text{-Ph-SN}$ ,  $\text{NiFeO}_x@G\text{-Ph-SN}$ , and  $\text{Ni}_3\text{FeO}_x@G\text{-Ph-SN}$ . The linear slope is equivalent to twice of the double-layer capacitance  $C_{dl}$ .

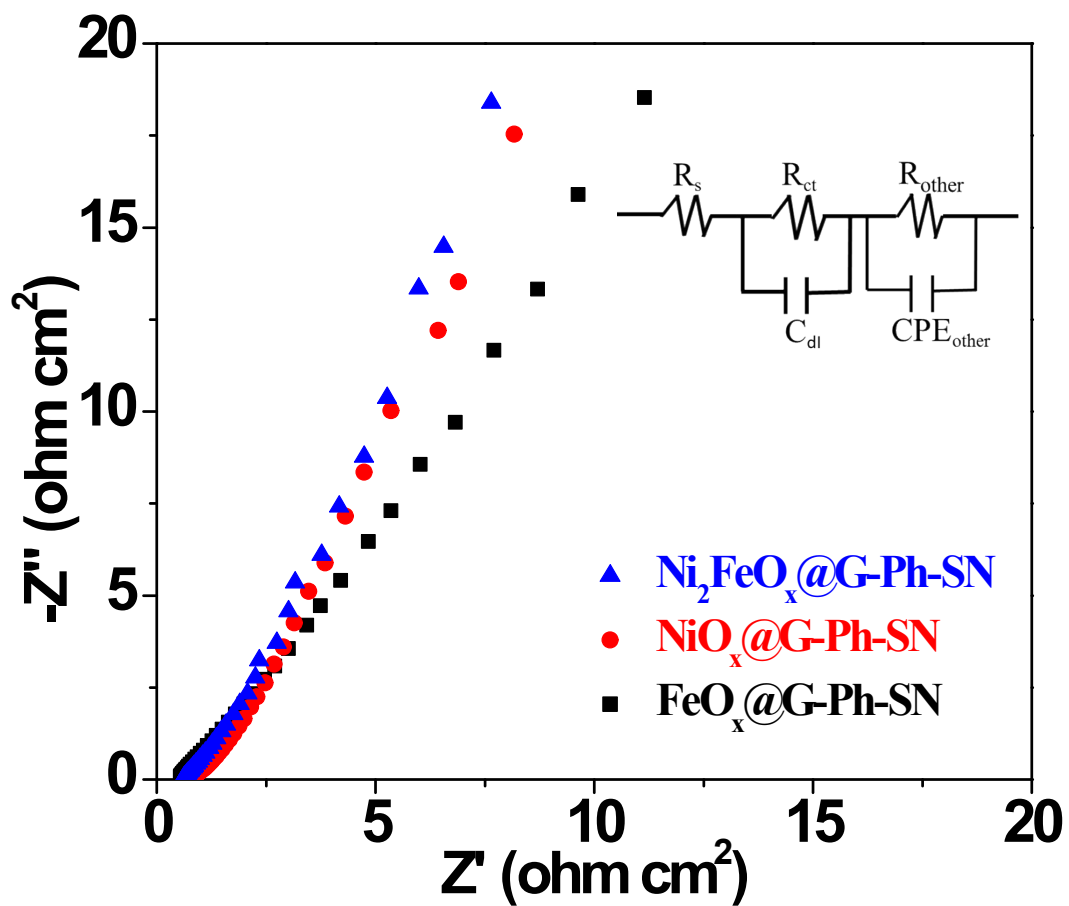

**Figure S10.** EIS of  $\text{FeO}_x@\text{G-Ph-SN}$ ,  $\text{NiO}_x@\text{G-Ph-SN}$ , and  $\text{Ni}_2\text{FeO}_x@\text{G-Ph-SN}$ . The inset is an equivalent circuit model.

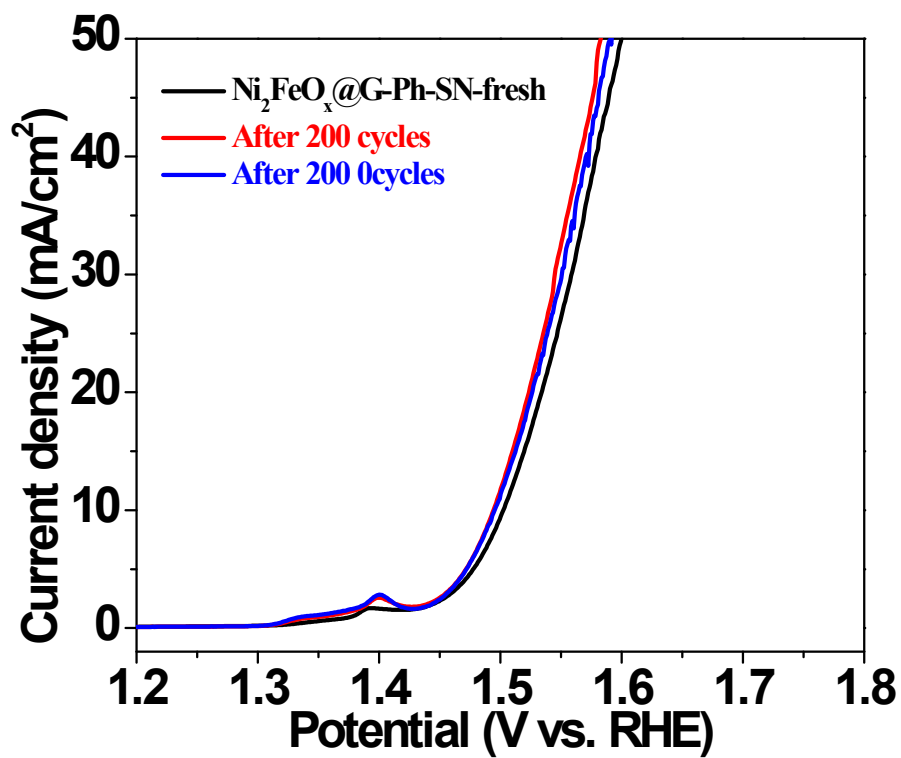

**Figure S11.** LSV polarization curves of fresh Ni<sub>2</sub>FeO<sub>x</sub>@G-Ph-SN, Ni<sub>2</sub>FeO<sub>x</sub>@G-Ph-SN after CV for 200 cycles, and Ni<sub>2</sub>FeO<sub>x</sub>@G-Ph-SN after CV for 2000 cycles.

**Table 1.** Comparison of the OER performance of different transition-metal electrocatalysts in 1 M KOH

| Catalyst                                     | $\eta@ 10 \text{ mA}\cdot\text{cm}^{-2}$ (mV) | Tafel slope ( $\text{mV}\cdot\text{dec}^{-1}$ ) | References |
|----------------------------------------------|-----------------------------------------------|-------------------------------------------------|------------|
| $\text{Ni}_2\text{FeO}_x@\text{G-Ph-SN}$     | 265                                           | 60.2                                            | This Work  |
| $\alpha\text{-FeCoO}_x$                      | 300                                           | 33                                              | 1          |
| NiFeOOH                                      | 340                                           | 60                                              | 2          |
| NiFe LDH                                     | 300                                           | 40                                              | 3          |
| $\text{Ni}_{0.75}\text{Fe}_{0.25}\text{OOH}$ | 258                                           | -                                               | 4          |
| $\text{NiCo}_{2.7}(\text{OH})_x$             | 350                                           | 65                                              | 5          |
| CCS Ni-Co                                    | 302                                           | 43.6                                            | 6          |
| Ni-Co LDHs                                   | 350                                           | 93                                              | 7          |

## References

1. M. S. Burke, M. G. Kast, L. Trotochaud, A. M. Smith and S. W. Boettcher, *J. Am. Chem. Soc.*, 2015, **137**, 3638.
2. J. R. Swierk, S. Klaus, L. Trotochaud, A. T. Bell and T. D. Tilley, *J. Phys. Chem. C*, 2015, **119**, 19022.
3. D. Friebel, M. W. Louie, M. Bajdich, K. E. Sanwald, Y. Cai, A. M. Wise, M. J. Cheng, D. Sokaras, T. C. Weng, R. Alonso-Mori, R. C. Davis, J. R. Bargar, J. K. Norskov, A. Nilsson and A. T. Bell, *J. Am. Chem. Soc.*, 2015, **137**, 1305.
4. A. S. Batchellor and S. W. Boettcher, *ACS Catal.*, 2015, **5**, 6680.
5. J. Nai, H. Yin, T. You, L. Zheng, J. Zhang, P. Wang, Z. Jin, Y. Tian, J. Liu, Z. Tang and L. Guo, *Adv. Energy Mater.*, 2015, **5**, 1401880.
6. S.-H. Bae, J.-E. Kim, H. Randriamahazaka, S.-Y. Moon, J.-Y. Park and I.-K. Oh, *Adv. Energy Mater.*, 2017, **7**, 1601492.
7. C. Wang, J. Zhang, C. Shi and D. Cai, *Int. J. Electrochem. Sci.*, 2017, **12**, 10003.
